# Supplementary material for: Evidence of vertical coupling: Meteorological storm Fabienne on 23 September 2018 and its related effects observed up to the ionosphere
Source: Copernicus journal article supplement (doi:10.5194/angeo-2019-26), 2019-03-05
Supplement: Supplementary file [file angeo-2019-26-AC4-supplement.pdf]

1  
2  
3  
4  
5

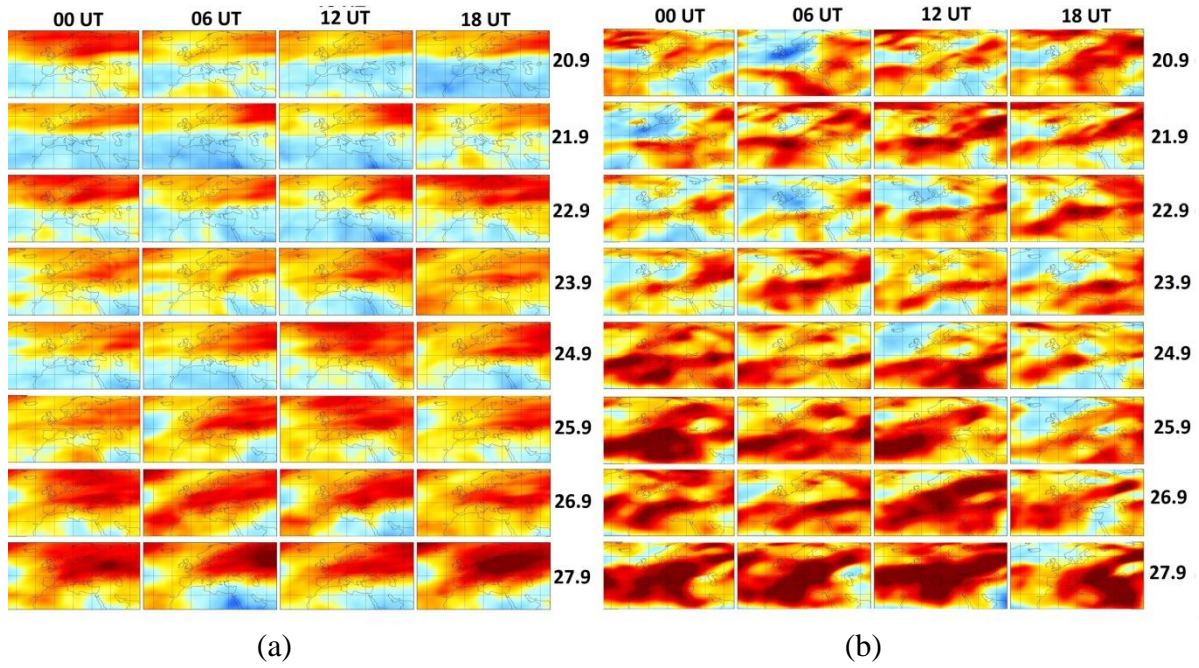

6  
7  
8 **Fig. 6.** Stratospheric wind above Europe at 1hPa (panel a), and at 0.1hPa (panel b). Red color  
9 represent eastward wind, blue represents westward wind.

10  
11  
12  
13  
14  
15  
16  
17  
18  
19  
20  
21

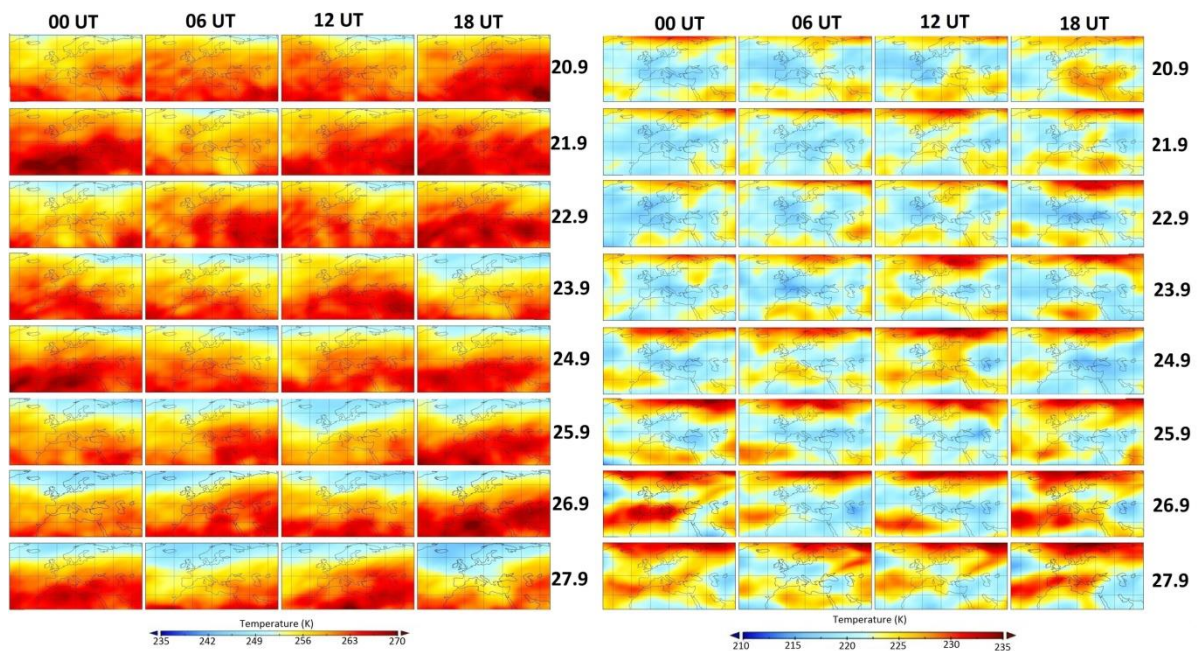

1  
2  
3  
4  
5

(a)

(b)

**Fig. 7.** Stratospheric temperature above Europe at 1hPa (panel a; temperature in the range 235 – 270 K) and at 0.1 hPa (panel b; temperature in the range 210 – 235 K).

1  
2  
3  
4  
5  
6

7

8

9

10

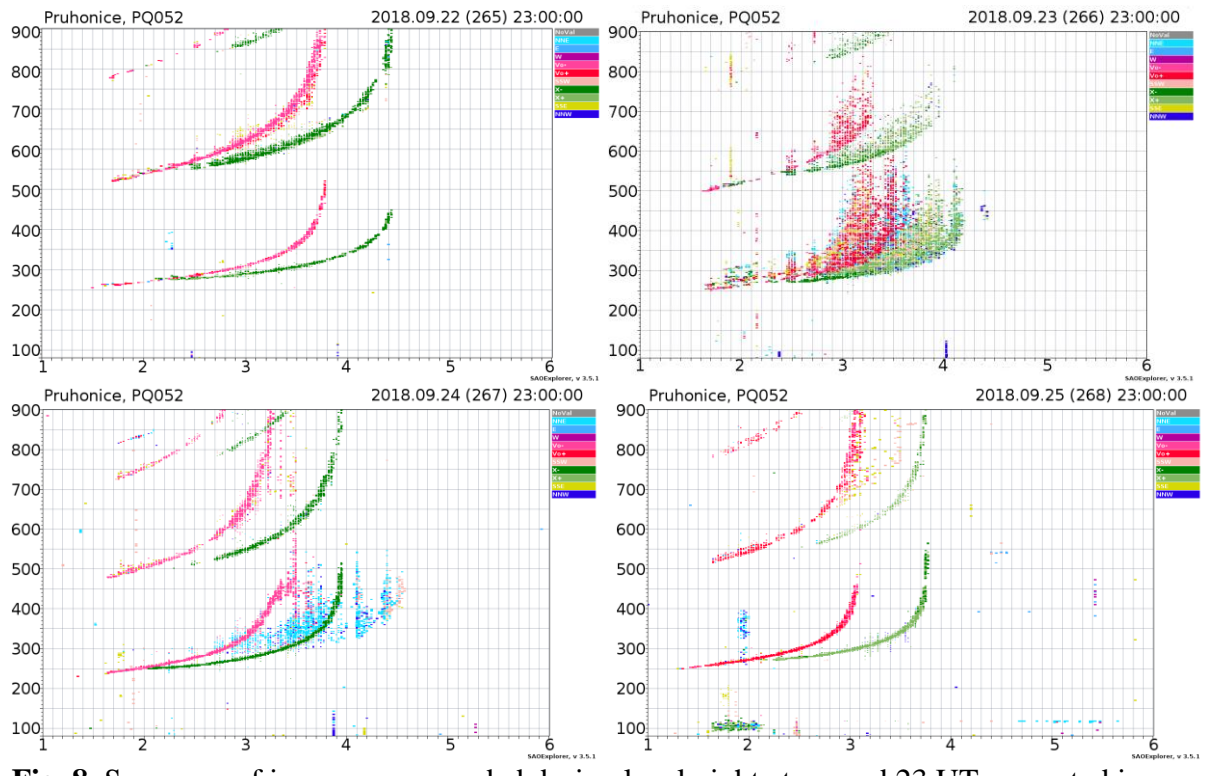

**Fig. 8.** Sequence of ionograms recorded during local night at around 23 UT presented in a standard DPS 4D format.

1  
2  
3  
4  
5  
6  
7  
8

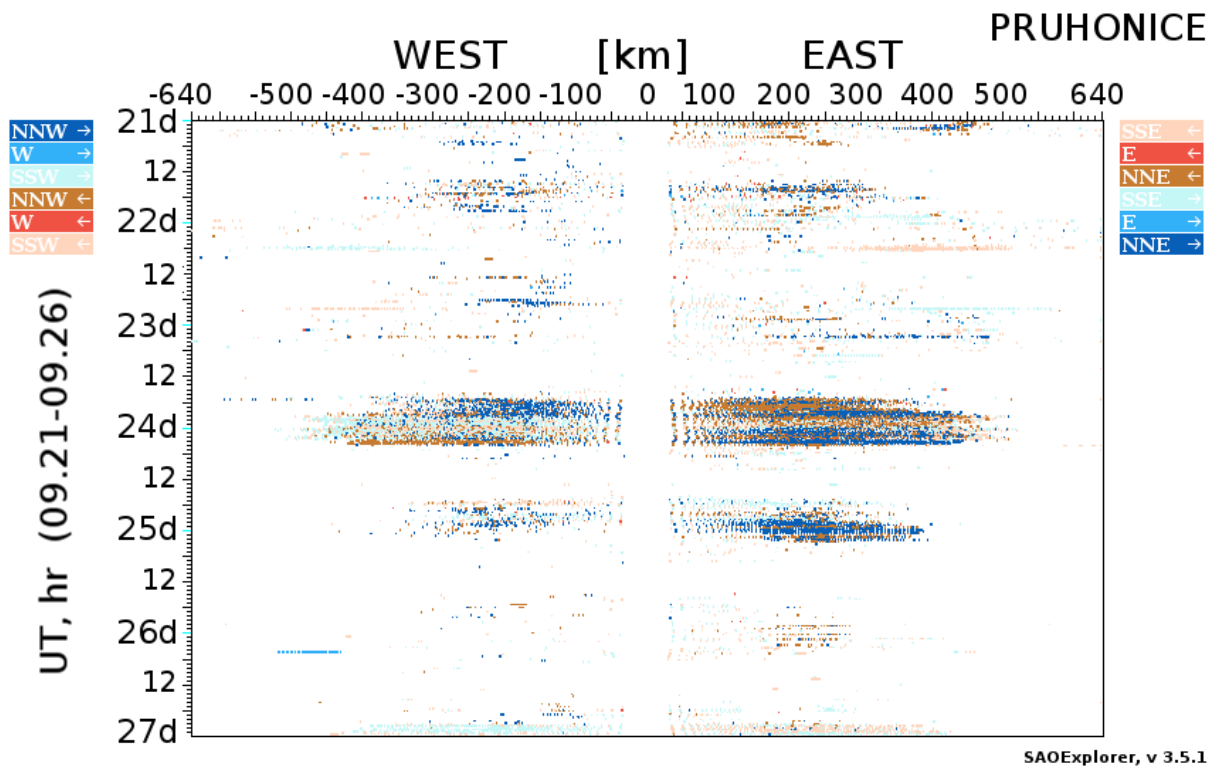

9  
10  
11  
12

**Fig. 9.** Directogram recorded on 21–26 September presented in a standard DPS 4D format.

1  
2  
3  
4  
5  
6

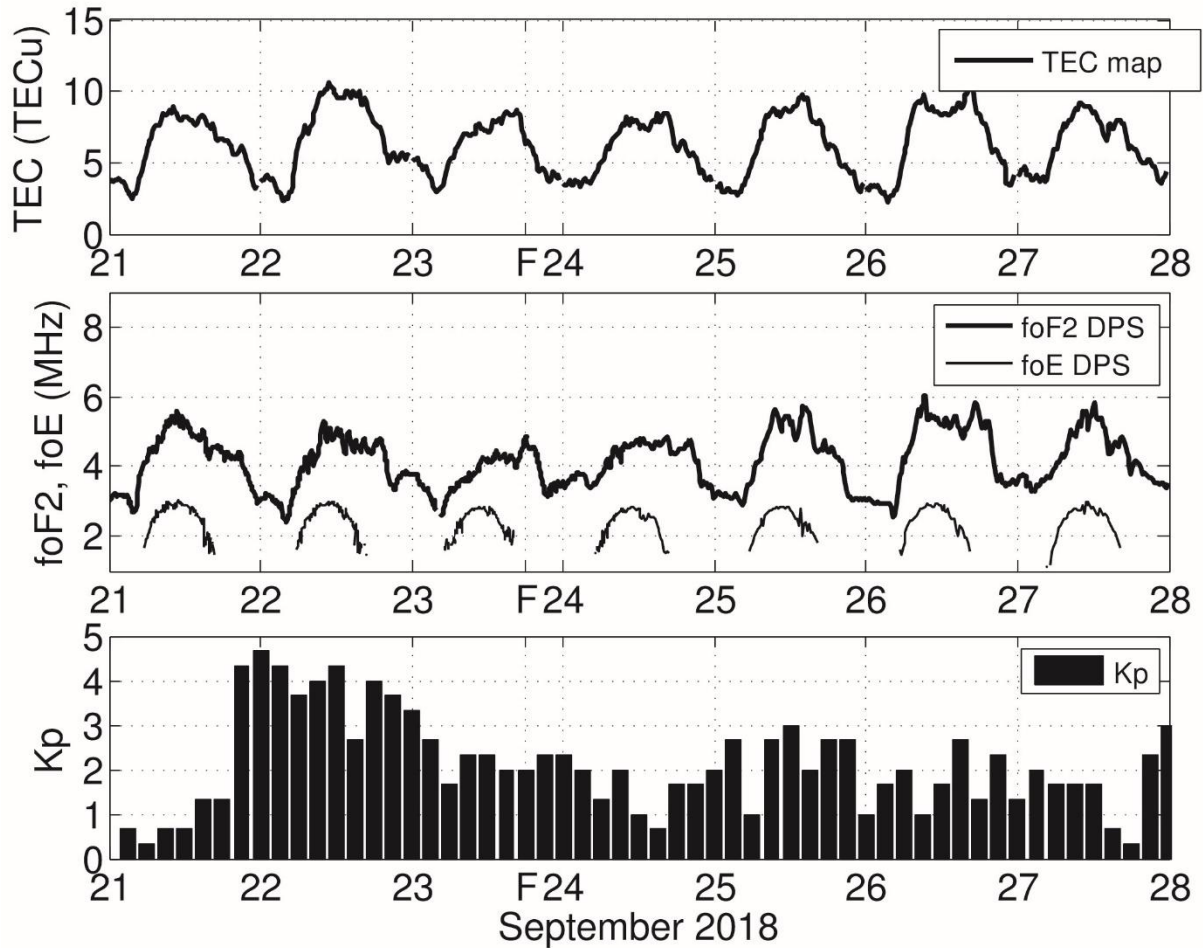

7  
8  
9  
10  
11

**Fig. 10.** Diurnal courses of Total Electron Content (upper panel), critical frequencies foF2 and foE (middle panel) above station Pruhonice (“F” denotes time of passage of the storm Fabienne over the station) and course of Kp index (bottom panel) during the observational period.

1  
2  
3  
4  
5  
6  
7  
8

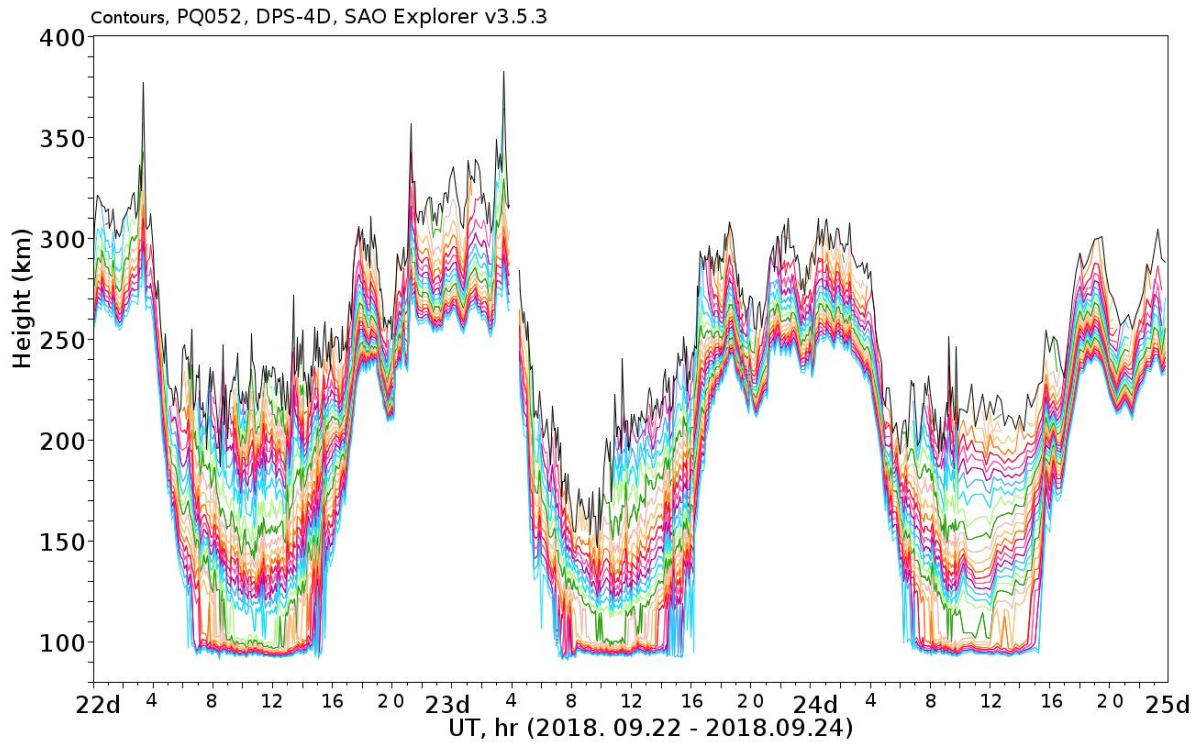

9  
10  
11  
12  
13

**Fig.11.** Variability of true-height reflection at fixed frequencies recorded during 22–24 September for frequency range 2–6 MHz with 0.1 MHz step, in a standard DPS 4D format.

1  
2  
3  
4  
5  
6  
7  
8  
9

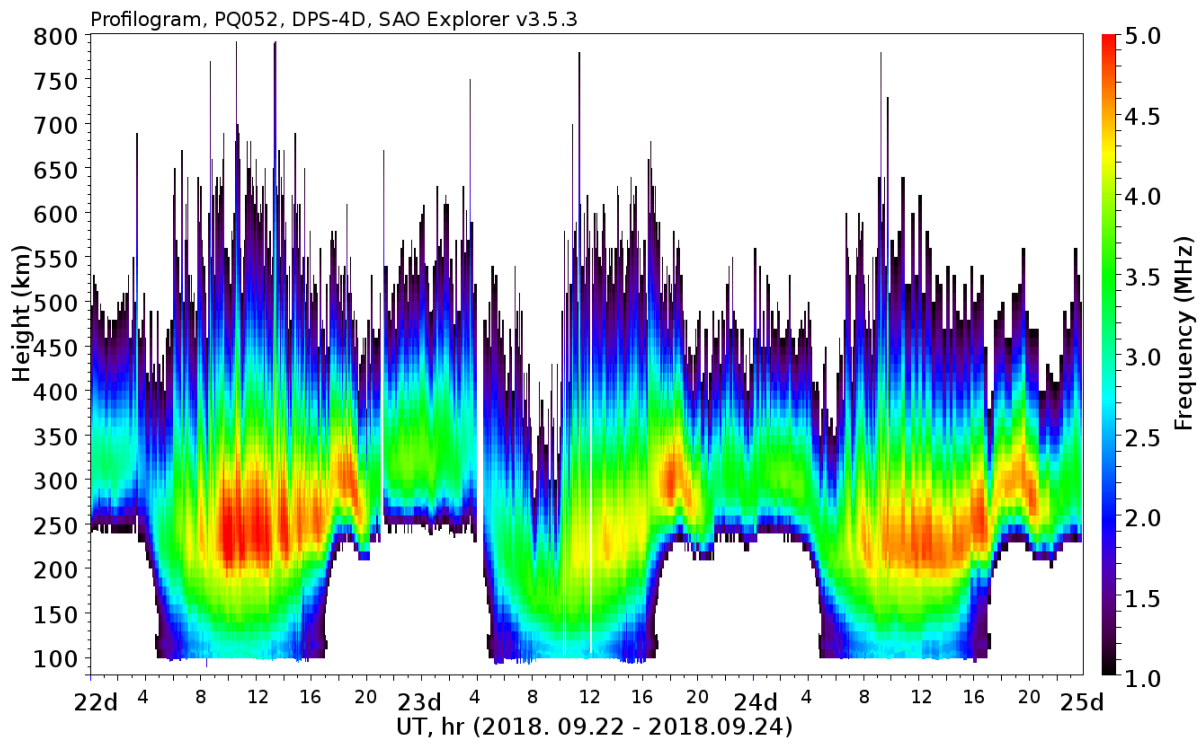

10  
11  
12

**Fig. 12.** Detail of profilograms in frequency – 22 September–24 September presented in a standard DPS 4D format.

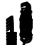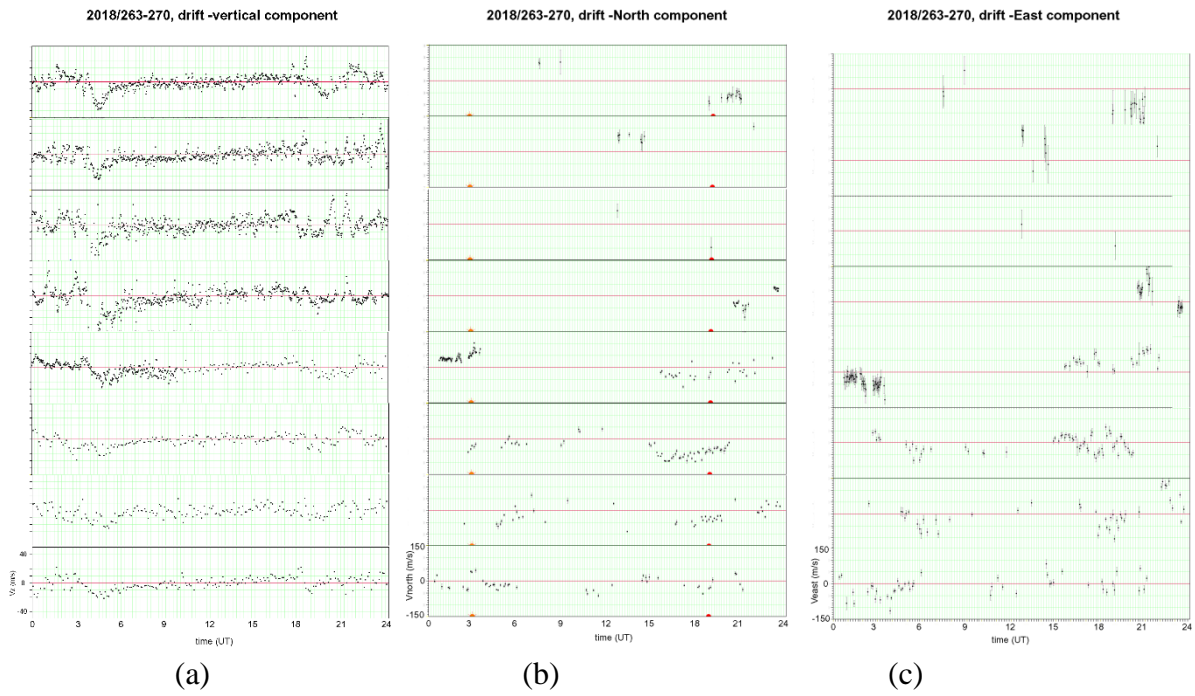

18  
19  
20  
21  
22

**Fig. 14.** Components of ionospheric plasma drift obtained by Digisonde DPS 4D – (a) vertical component; (b) North component; (c) East component presented in a standard DPS 4D format.



1  
2  
3  
4  
5  
6  
7  
8  
9  
10

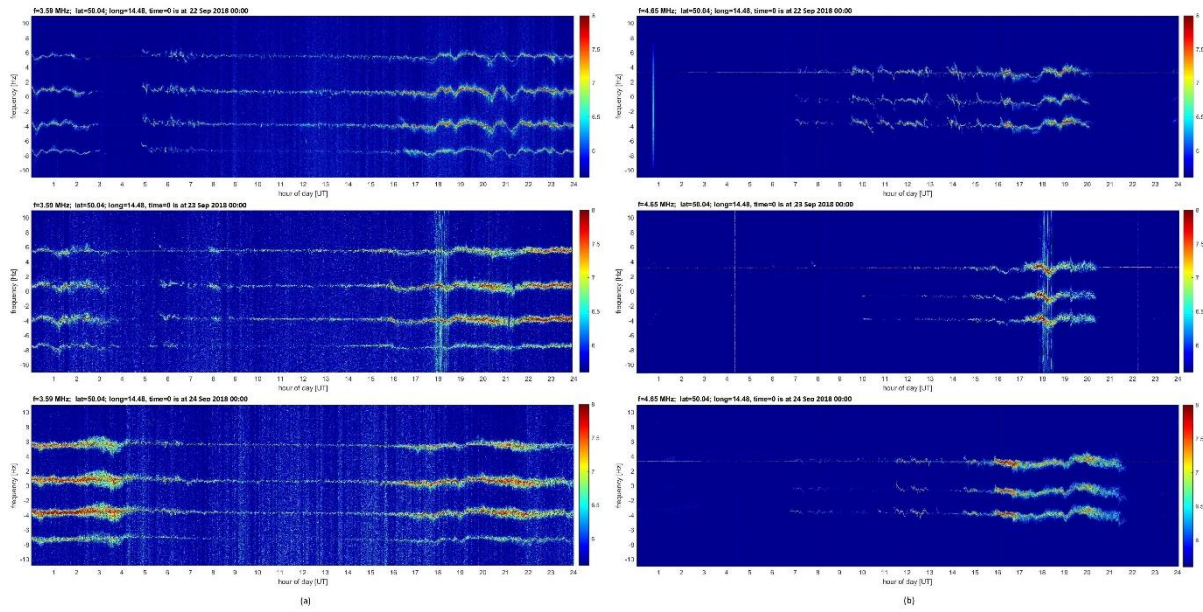

11  
12  
13  
14  
15

(a)

(b)

**Fig. 15.** Continuous Doppler Sounding measurement on three consequent days 22–24 September on frequency 3.59 MHz (a) and 4.65 MHz (b).
